# Supplementary material for: Spatial clustering of suicide mortality and associated community characteristics in Kanagawa prefecture, Japan, 2011–2017
Source: BMC Psychiatry. 2020 Feb 18;20:74. doi: 10.1186/s12888-020-2479-7 (PMC7029524; doi:10.1186/s12888-020-2479-7)
Supplement: Supplementary file 1 — Additional file 1. Supplementary material 1. The proportion of suicides according to specific motivations during the 2011 to 2017 by year. Supplementary material 2. Indices for standardized mortality. Supplementary material 3. Regional code of Kanagawa prefecture. Supplementary material 4. SMR for male suicide by year (each year standardization) in Kanagawa prefecture. Supplementary material 5. SMR for female suicide by year (each year standardization) in Kanagawa prefecture. Supplementary material 6. EBSMR for male suicide by year (total year standardization) in Kanagawa prefecture. Supplementary material 7. EBSMR for female suicide by year (total year standardization) in Kanagawa prefecture. [file 12888_2020_2479_MOESM1_ESM.xlsx]

## Sheet: Supple.1
	Supplementary material 1. The proportion of suicides according to specific motivations during the 2011 to 2017 by year.

## Sheet: Supple.2
Supplementary material 2.

## Sheet: Supple.3
			Supplementary material 3. Regional code of Kanagawa prefecture
	Note: Ward belongs to one of the 3 big (administrative) cities. Namely, region number [1]-[18] belongs to Yokohama city (white), [19]-[25] belongs to Kawasaki city (light gray), and [26]-[28] belongs to Sagamihara city (dark gray).

## Sheet: Suppl.4
Supplementary material 4. SMR for male suicide by year (each year standardization) in Kanagawa prefecture.

## Sheet: Suppl.5
Supplementary material 5. SMR for female suicide by year (each year standardization) in Kanagawa prefecture.

## Sheet: Supple.6
Supplementary materiale 6. EBSMR for male suicide by year (total year standardization) in Kanagawa prefecture.

## Sheet: Supple.7
Supplementary material 7. EBSMR for female suicide by year (total year standardization) in Kanagawa prefecture.
